# Supplementary material for: Sex-Specific Effect of Estrogen Sulfotransferase on Mouse Models of Type 2 Diabetes
Source: Oxford University Press journal article supplement (doi:10.2337/db11-1152), 2012-03-22

SUPPLEMENTARY DATA

**Supplementary Table 1.** Metabolic parameters of female *ob/ob* and *obe* mice

|                                                        | <i>ob/ob</i>   | <i>obe</i>     |
|--------------------------------------------------------|----------------|----------------|
| Food intake (g/day/mice)                               | 5.69±0.48      | 6.02±0.33      |
| Food intake (g/day/kg lean mass)                       | 317.6±22.6     | 310.3±18.1     |
| Physical activity (X-total counts/day)                 | 25079.3±3872.4 | 30037.5±5186.8 |
| Gastrocnemius and soleus muscles weight (g)            | 0.20±0.02      | 0.27±0.04*     |
| Gastrocnemius and soleus muscles index (% body weight) | 0.35±0.04      | 0.53±0.08**    |

*obe, ob/ob-Est null*; \*,  $P < 0.05$ ; \*\*,  $P < 0.01$

**Supplementary Figure 1.** *Obe* female mice showed an unchanged expression of estrogen responsive genes in skeletal muscle and white adipose tissue (WAT), and ovariectomy abolished the effect of loss of *Est* on the expression of *IGF-1*. (a) Expression of estrogen responsive genes was measured by real-time PCR analysis. (b) Serum IGF-1 and hepatic *IGF-1* mRNA levels in ovariectomized mice. \*\*,  $P < 0.01$ ; NS, statistically not significant; *ob/ob* versus *obe*.

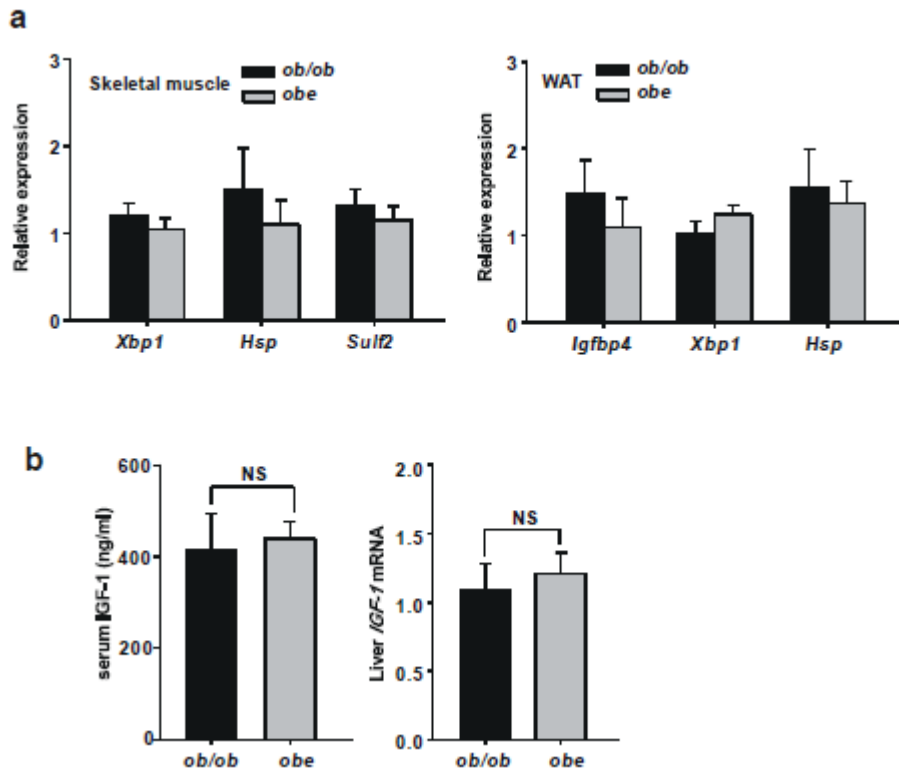

SUPPLEMENTARY DATA

**Supplementary Figure 2.** Ovariectomy abolished the protective effect of *Est* ablation on DEX-induced hyperglycemia. GTT tests were performed on ovariectomized mice before and after two weeks of DEX treatment.

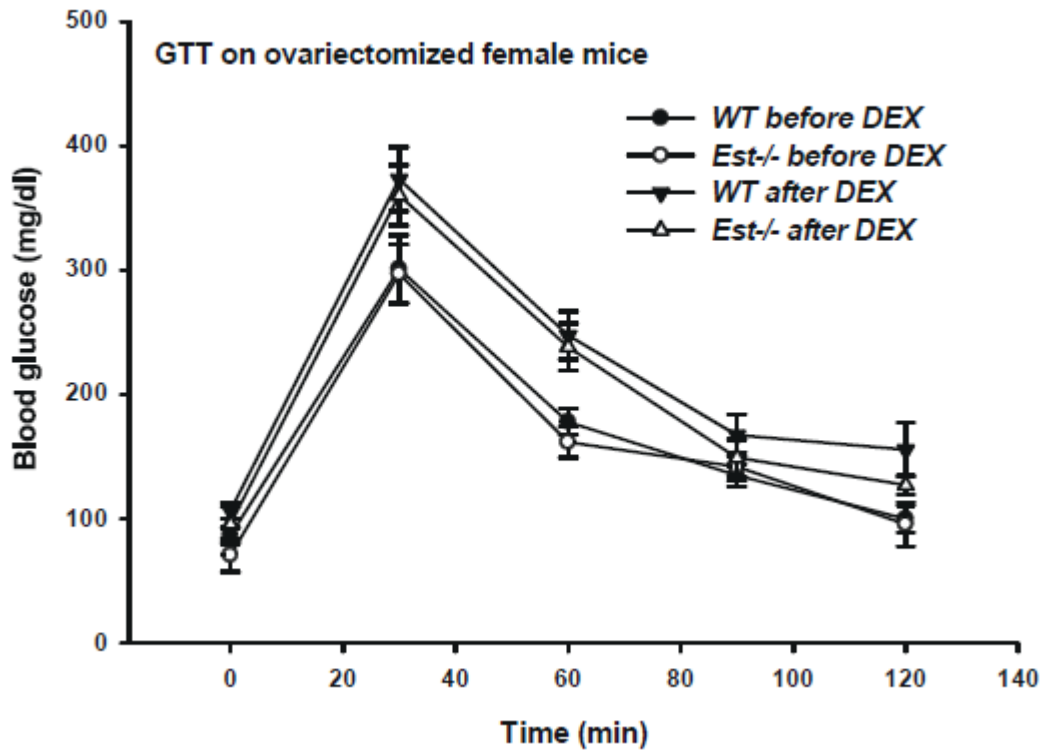

**Supplementary Figure 3.** Castration failed to improve metabolic function in *obe* males. GTT tests were performed on castrated male mice. \*,  $P < 0.05$ ; \*\*,  $P < 0.01$ ; *ob/ob* versus *obe*.

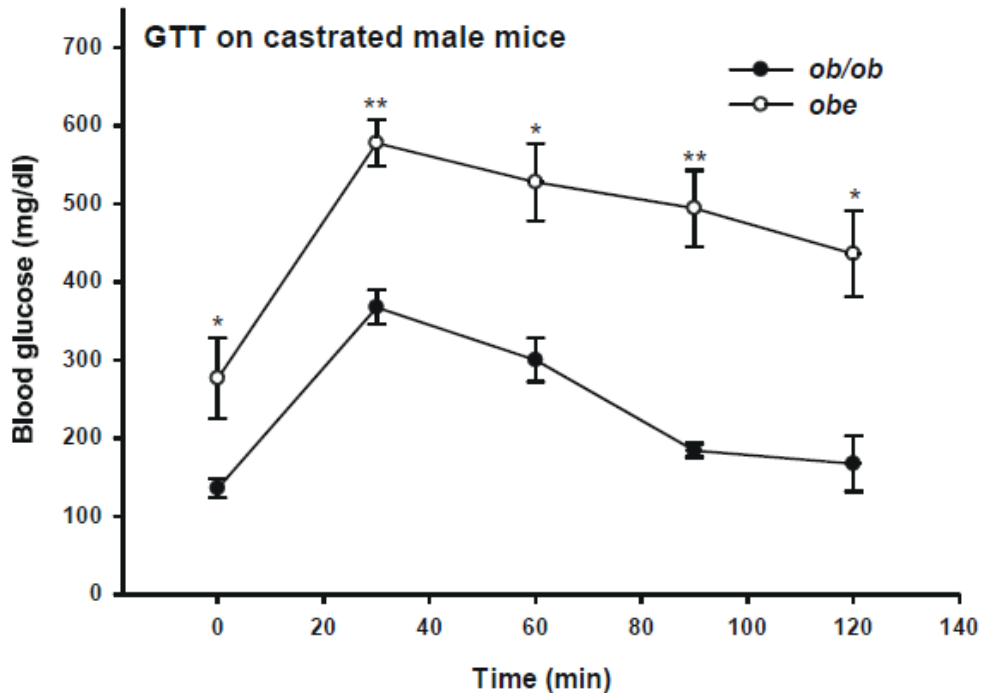

SUPPLEMENTARY DATA

**Supplementary Figure 4.** H&E staining of the whole pancreas section of male (a) and female (b) *ob/ob* and *obe* mice. Arrows indicate islets.

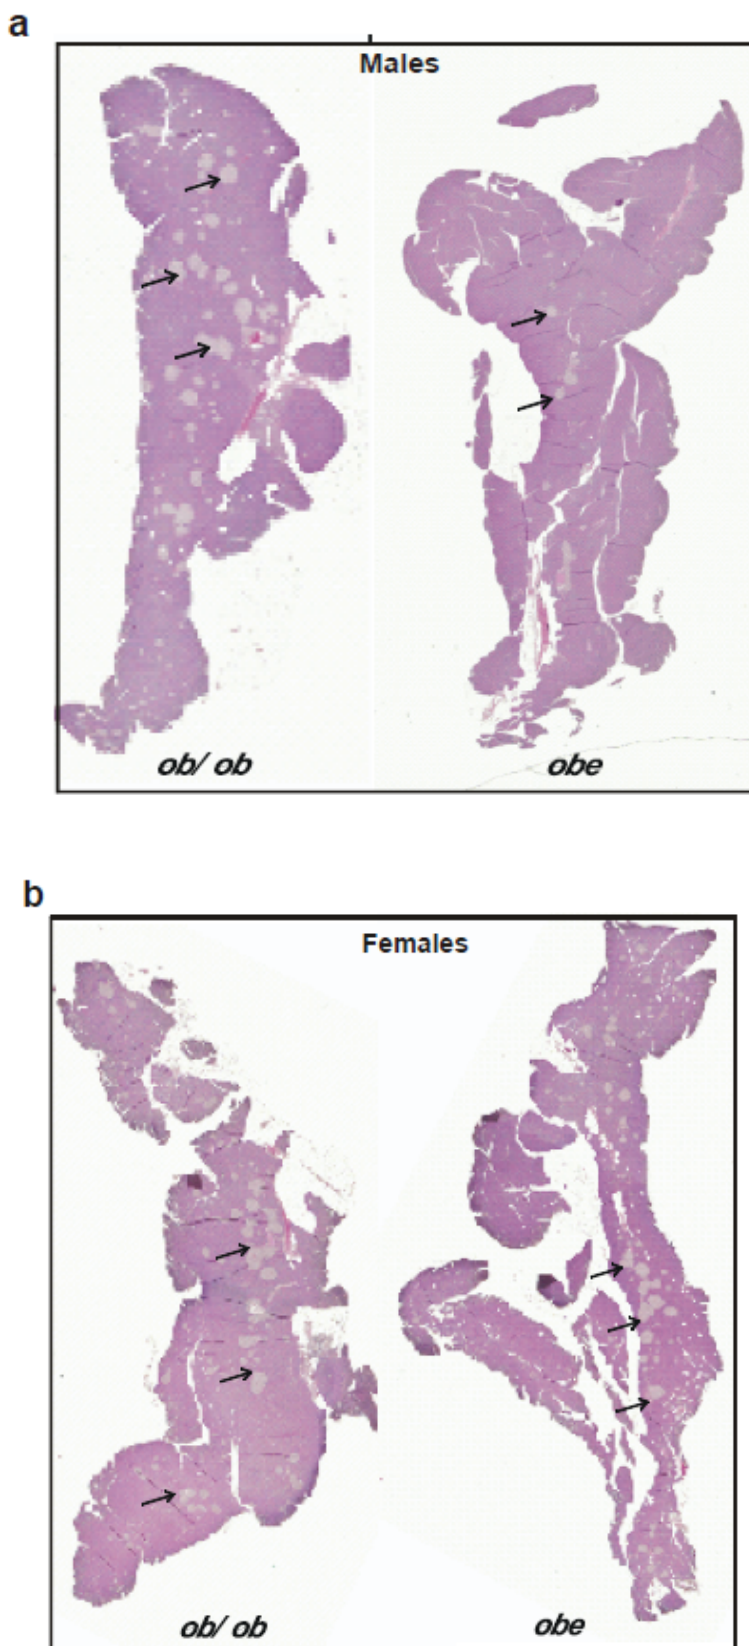

SUPPLEMENTARY DATA

**Supplementary Figure 5.** *Est* ablation had little effect on the expression of macrophage markers and inflammatory genes in the WAT of *obe* females. The gene expression in the abdomen fat was measured by real-time PCR analysis. Mcp1, cationic peptide 1; Mac1, macrophage antigen 1; Adam8, Adam metalloproteinase domain 8; Mip1, macrophage inflammatory protein-1, Tnf, tumor necrosis factor

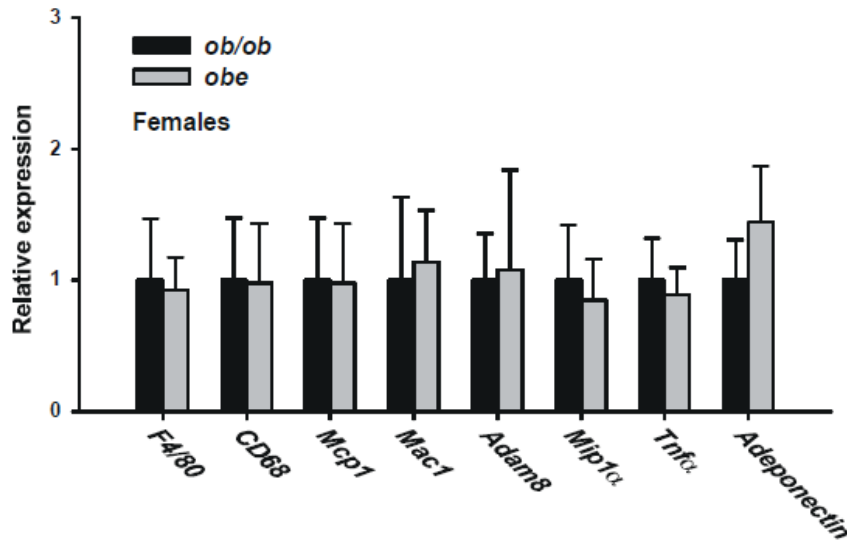

**Supplementary Figure 6.** Worsened insulin sensitivity in *obe* male mice. Twelve-week old males were subject to ITT test. \*,  $P < 0.05$ , *ob/ob* versus *obe*.

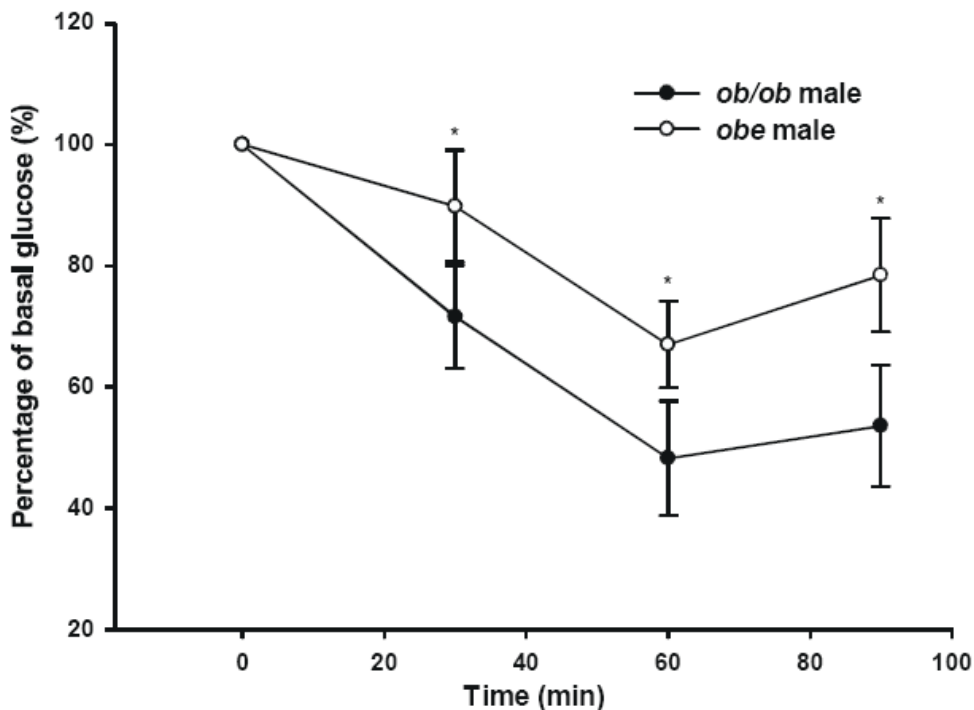

Supplement: db111152supplementarydata.pdf [file db111152supplementarydata.pdf]
